# Supplementary material for: Moles of a Substance per Cell Is a Highly Informative Dosing Metric in Cell Culture
Source: PLOS journal article supplement (doi:10.1371/journal.pone.0132572), 2015-07-14
Supplement: S2 (10.1371/journal.pone.0132572.s002) [file journal.pone.0132572.s002]

## S2\_Figure

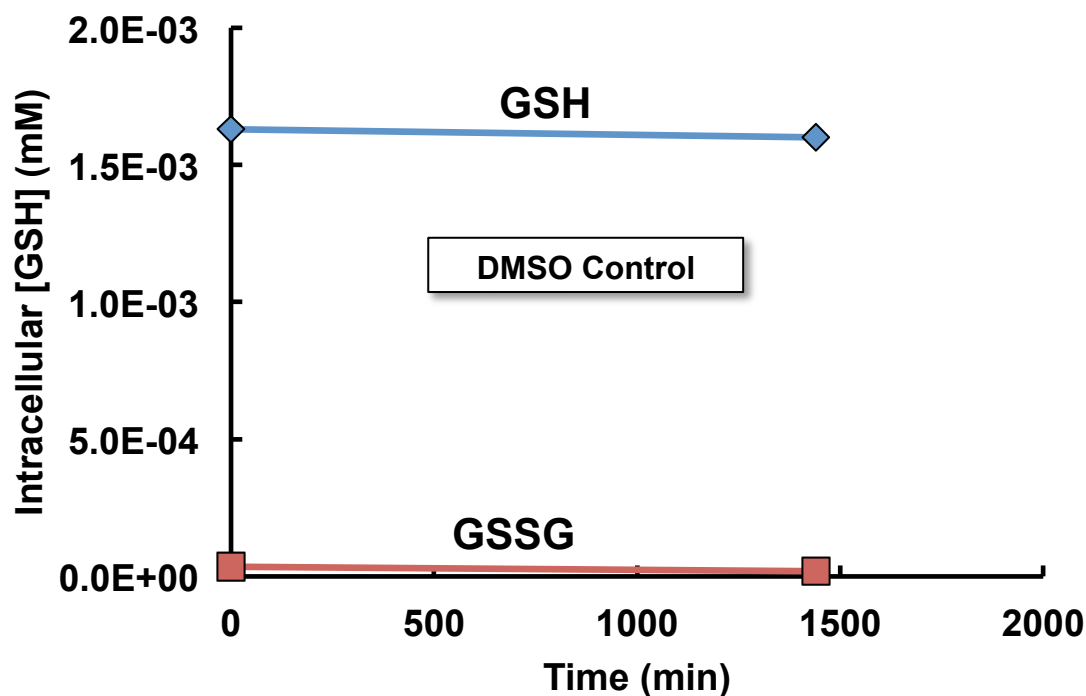

**Supporting Information Figure S2. Exposure to DMSO, the vehicle for 1,4-BQ, does not affect the intracellular concentration of GSH or GSSG.** The protocol to expose cells to DMSO alone were identical to those used to expose cells to 1,4-BQ using DMSO as the vehicle.
